# Supplementary material for: Rituximab versus tocilizumab in rheumatoid arthritis: synovial biopsy-based biomarker analysis of the phase 4 R4RA randomized trial
Source: PubMed Central journal article supplement (PMC9205785; doi:10.1038/s41591-022-01789-0), 2022-05-19
Supplement: 41591_2022_1789_MOESM1_ESM.pdf [file 41591_2022_1789_MOESM1_ESM.pdf]

---

**Supplementary information**

---

**Rituximab versus tocilizumab in  
rheumatoid arthritis: synovial biopsy-  
based biomarker analysis of the phase 4  
R4RA randomized trial**

---

In the format provided by the  
authors and unedited

## Supplementary Figure S1 | Trial scheme

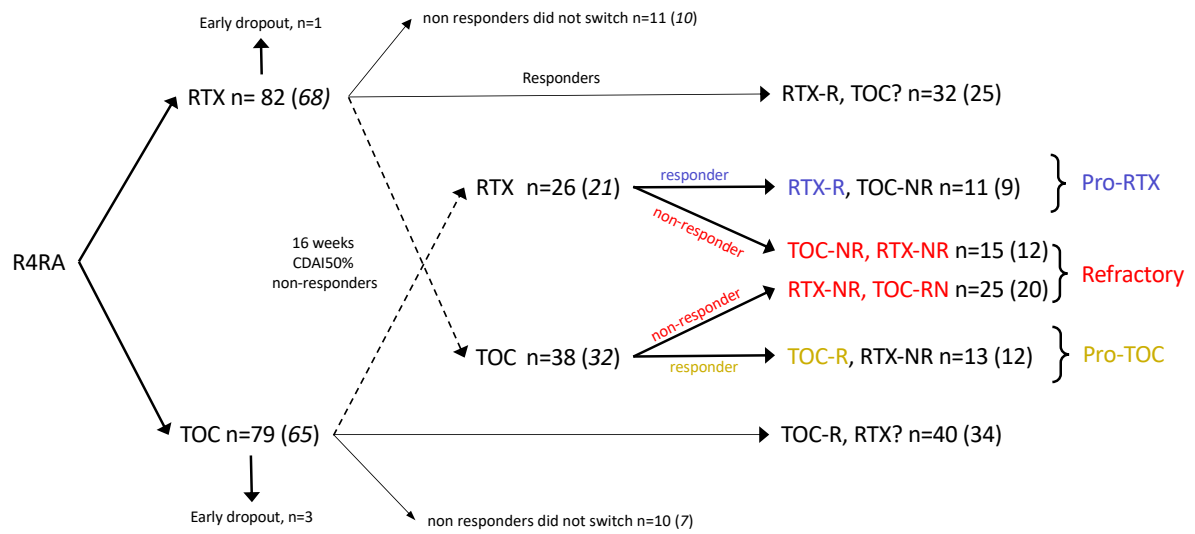

Tocilizumab (TOC), rituximab (RTX), responder (R), non-responder (NR), n = samples available for histology, (n) = samples available for RNAseq

**Supplementary Figure 2 | Comparison of negative binomial mixed effects model and gaussian mixed effects model applied to log count data**

**a**, Correlation plots of  $-\log_{10}$  P values for analysis comparing effect of each drug over time using model  $\text{gene} \sim \text{drug} * \text{time} + (1 | \text{patient})$ . Gaussian p values for model parameters time, drug and interaction term time:drug are plotted on the x axis, while negative binomial mixed effects model p values are plotted on the y axis. P values are shown as  $-\log_{10}$ . Each point represents a single gene. Red line and shaded grey region shows linear regression line with 95% confidence intervals.

**b**, Similar analysis comparing Gaussian mixed model and negative binomial mixed model for the comparison of responders vs non-responders over time for the rituximab treated cohort.

**c**, Similar analysis comparing Gaussian mixed model and negative binomial mixed model for the comparison of responders vs non-responders over time for the tocilizumab treated cohort.

**d-f**, QQ plots showing observed vs expected  $-\log_{10}$  p values for each of the 3 analyses in (a-c) demonstrating substantially increased power of negative binomial mixed models compared to Gaussian models for detecting significant genes.

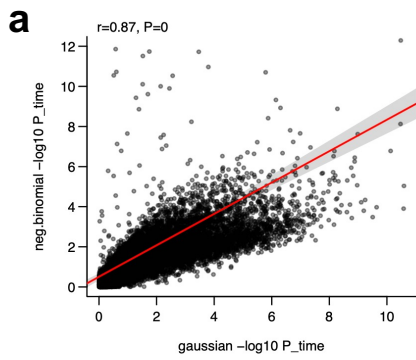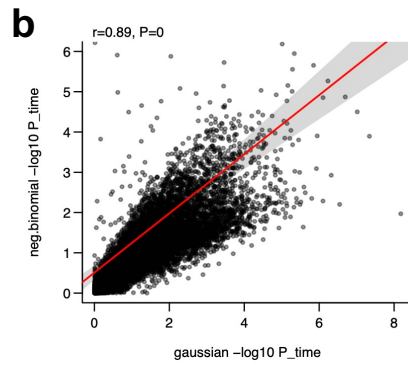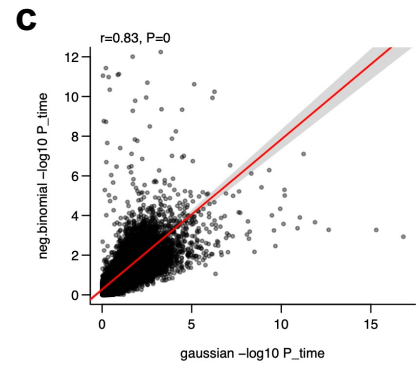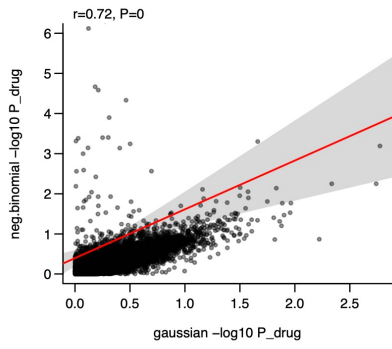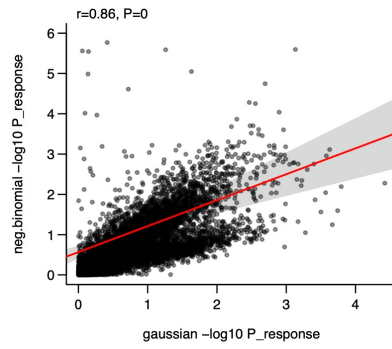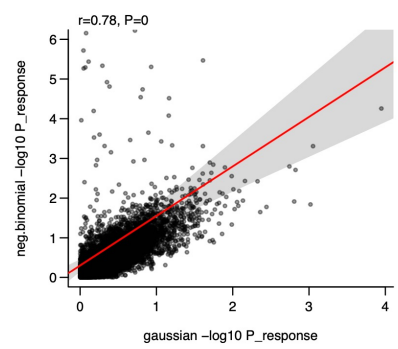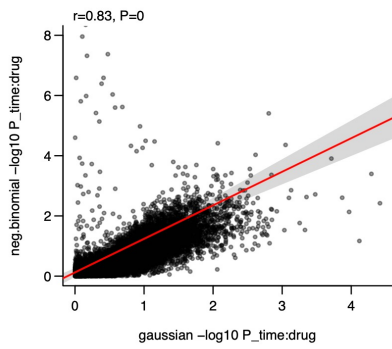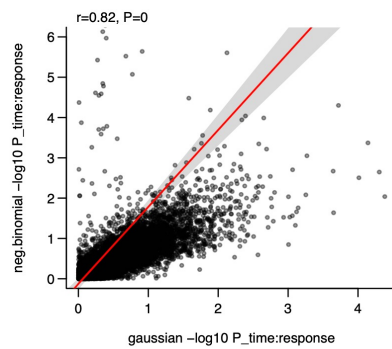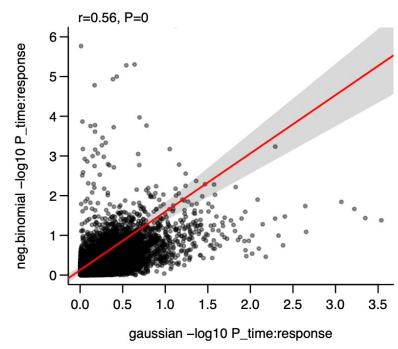

**d** gene  $\sim$  time \* drug + (1 | patient)

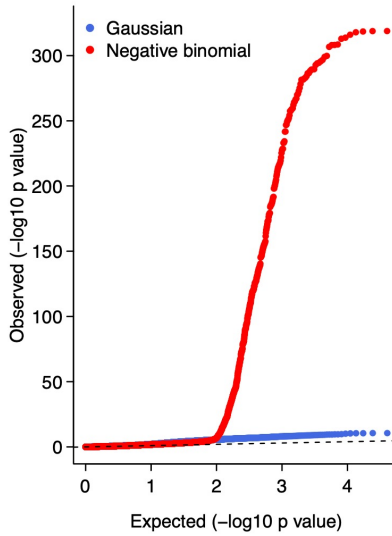

**e** gene  $\sim$  time \* rituximab\_response + (1 | patient)

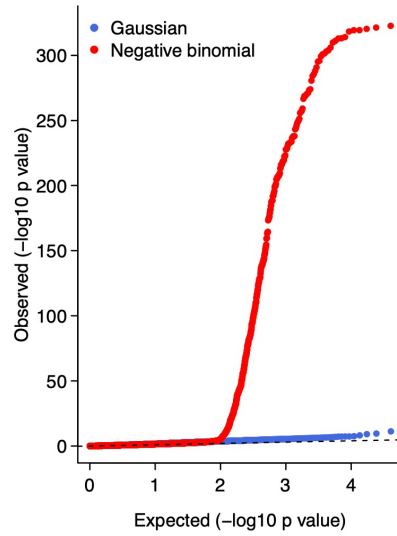

**f** gene  $\sim$  time \* tocilizumab\_response + (1 | patient)

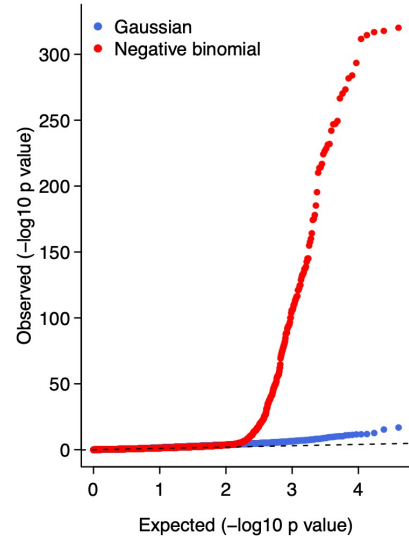

## SUPPLEMENTARY TABLES

**Supplementary Table S1 | Machine learning model evaluation using nested cross-validation**

| Model              | Filtering  | AUC   | Accuracy | Number of input features | Number of sparse output features | Precision | Youden sensitivity | Youden specificity |
|--------------------|------------|-------|----------|--------------------------|----------------------------------|-----------|--------------------|--------------------|
| <b>Rituximab</b>   |            |       |          |                          |                                  |           |                    |                    |
| glmnet             | Univariate | 0.744 | 0.662    | 117                      | 40                               | 0.562     | 0.8400             | 0.628              |
| svmRadial          | Univariate | 0.725 | 0.676    | 134                      | 133                              | 0.556     | 0.9600             | 0.512              |
| glmnet             | Univariate | 0.718 | 0.676    | 136                      | 26                               | 0.565     | 0.7600             | 0.698              |
| svmRadial          | Univariate | 0.707 | 0.706    | 118                      | 117                              | 0.609     | 0.6800             | 0.721              |
| gbm                | Univariate | 0.706 | 0.676    | 126                      | 54                               | 0.579     | 0.8000             | 0.558              |
| gbm                | Univariate | 0.701 | 0.706    | 137                      | 92                               | 0.619     | 0.9200             | 0.465              |
| svmPoly            | Univariate | 0.694 | 0.662    | 143                      | 142                              | 0.545     | 0.8800             | 0.535              |
| svmPoly            | Univariate | 0.694 | 0.662    | 124                      | 123                              | 0.538     | 0.9200             | 0.488              |
| rf                 | Univariate | 0.687 | 0.647    | 125                      | 124                              | 0.522     | 0.9200             | 0.558              |
| rf                 | Univariate | 0.687 | 0.603    | 129                      | 128                              | 0.429     | 0.8800             | 0.535              |
| glmnet             | None       | 0.638 | 0.618    | 1438                     | 31                               | 0.471     | 0.7200             | 0.605              |
| glmnet             | None       | 0.624 | 0.632    | 1438                     | 0*                               | 0.500     | 0.8800             | 0.395              |
| pda                | Univariate | 0.577 | 0.574    | 119                      | 118                              | 0.423     | 0.4400             | 0.767              |
| mda                | Univariate | 0.532 | 0.544    | 0*                       | 0*                               | 0.375     | 0.8000             | 0.419              |
| <b>Tocilizumab</b> |            |       |          |                          |                                  |           |                    |                    |
| glmnet             | Univariate | 0.681 | 0.615    | 117                      | 39                               | 0.655     | 0.6471             | 0.677              |
| glmnet             | None       | 0.648 | 0.585    | 1438                     | 14                               | 0.590     | 0.5588             | 0.710              |
| gbm                | Univariate | 0.626 | 0.585    | 125                      | 95                               | 0.606     | 0.4118             | 0.806              |
| gbm                | Univariate | 0.597 | 0.569    | 140                      | 92                               | 0.600     | 0.3235             | 0.935              |
| glmnet             | Univariate | 0.582 | 0.600    | 136                      | 45                               | 0.618     | 0.6765             | 0.581              |
| pda                | Univariate | 0.554 | 0.538    | 121                      | 120                              | 0.571     | 0.7650             | 0.452              |
| mda                | Univariate | 0.542 | 0.569    | 0*                       | 0*                               | 0.575     | 0.9120             | 0.258              |
| svmRadial          | Univariate | 0.524 | 0.462    | 128                      | 127                              | 0.484     | 0.7647             | 0.387              |
| svmRadial          | Univariate | 0.503 | 0.523    | 131                      | 130                              | 0.552     | 0.5588             | 0.581              |
| rf                 | Univariate | 0.490 | 0.492    | 135                      | 134                              | 0.514     | 0.3824             | 0.742              |
| svmPoly            | Univariate | 0.457 | 0.462    | 133                      | 132                              | 0.486     | 0.0294             | 1.000              |
| svmPoly            | Univariate | 0.430 | 0.446    | 130                      | 129                              | 0.471     | 0.2647             | 0.774              |
| rf                 | Univariate | 0.412 | 0.385    | 133                      | 132                              | 0.421     | 0.2647             | 0.774              |
| <b>Refractory</b>  |            |       |          |                          |                                  |           |                    |                    |
| gbm                | Univariate | 0.686 | 0.696    | 135                      | 53                               | 0.750     | 0.762              | 0.562              |
| rf                 | Univariate | 0.683 | 0.723    | 128                      | 127                              | 0.758     | 0.700              | 0.656              |
| glmnet             | None       | 0.682 | 0.732    | 1438                     | 14                               | 0.798     | 0.762              | 0.562              |
| rf                 | Univariate | 0.678 | 0.732    | 118                      | 117                              | 0.772     | 0.500              | 0.844              |

|           |            |       |       |      |     |       |       |       |
|-----------|------------|-------|-------|------|-----|-------|-------|-------|
| svmPoly   | Univariate | 0.678 | 0.705 | 120  | 119 | 0.753 | 0.637 | 0.688 |
| glmnet    | None       | 0.673 | 0.705 | 1438 | 0*  | 0.747 | 0.838 | 0.438 |
| glmnet    | None       | 0.661 | 0.625 | 1438 | 43  | 0.711 | 0.650 | 0.688 |
| svmRadial | Univariate | 0.654 | 0.741 | 142  | 141 | 0.758 | 0.850 | 0.469 |
| svmRadial | Univariate | 0.649 | 0.723 | 134  | 133 | 0.769 | 0.637 | 0.656 |
| rf        | Univariate | 0.645 | 0.696 | 142  | 141 | 0.750 | 0.600 | 0.688 |
| svmPoly   | Univariate | 0.632 | 0.714 | 128  | 127 | 0.750 | 0.637 | 0.719 |
| svmPoly   | Univariate | 0.592 | 0.723 | 132  | 131 | 0.753 | 0.863 | 0.406 |
| glmnet    | Univariate | 0.586 | 0.661 | 137  | 24  | 0.733 | 0.650 | 0.594 |
| glmnet    | Univariate | 0.567 | 0.652 | 125  | 29  | 0.730 | 0.537 | 0.719 |
| svmRadial | Univariate | 0.566 | 0.688 | 132  | 131 | 0.742 | 0.688 | 0.562 |
| mda       | Univariate | 0.566 | 0.607 | 142  | 141 | 0.757 | 0.875 | 0.344 |
| pda       | Univariate | 0.564 | 0.634 | 146  | 145 | 0.760 | 0.588 | 0.656 |
| glmnet    | Univariate | 0.552 | 0.634 | 124  | 26  | 0.714 | 0.662 | 0.531 |

glmnet = lasso and elastic-net generalized linear model; rf= random forest; gbm=gradient boosting machine; svmRadial=radial support vector machine; svmPoly = polynomial support vector machine.

\* Final fit failed.

**Supplementary Table S2 | Best tuned parameters for final models**

| i) Rituximab glmnet model |             |                   |                      | ii) Tocilizumab glmnet model |             |                   |                      | iii) Refractory gbm model |           |                   |            |                    |                    |
|---------------------------|-------------|-------------------|----------------------|------------------------------|-------------|-------------------|----------------------|---------------------------|-----------|-------------------|------------|--------------------|--------------------|
| Outer fold                | alpha       | lambda            | N of sparse features | Outer fold                   | alpha       | lambda            | N of sparse features | Outer fold                | N trees   | Interaction depth | shrinkage  | N min obs. in node | Number of features |
| <b>Fold 1</b>             | 1           | 0.0143845         | 16                   | Fold 1                       | 1           | 6.1585E-05        | 23                   | Fold 1                    | 100       | 1                 | 0.1        | 10                 | 65                 |
| <b>Fold 2</b>             | 0.7         | 0.0143845         | 29                   | Fold 2                       | 0.7         | 0.02636651        | 19                   | Fold 2                    | 50        | 3                 | 0.1        | 10                 | 107                |
| <b>Fold 3</b>             | 0.7         | 0.0078476         | 35                   | Fold 3                       | 0.7         | 0.00428133        | 33                   | Fold 3                    | 50        | 3                 | 0.1        | 10                 | 108                |
| <b>Fold 4</b>             | 0.8         | 0.02636651        | 21                   | Fold 4                       | 0.7         | 0.02636651        | 24                   | Fold 4                    | 100       | 2                 | 0.1        | 10                 | 117                |
| <b>Fold 5</b>             | 0.8         | 0.00428133        | 34                   | Fold 5                       | 0.9         | 0.0143845         | 27                   | Fold 5                    | 150       | 3                 | 0.1        | 10                 | 216                |
| <b>Fold 6</b>             | 0.9         | 0.00428133        | 30                   | Fold 6                       | 0.7         | 0.00428133        | 26                   | Fold 6                    | 100       | 1                 | 0.1        | 10                 | 76                 |
| <b>Fold 7</b>             | 0.8         | 0.00428133        | 32                   | Fold 7                       | 0.7         | 0.0143845         | 28                   | Fold 7                    | 100       | 2                 | 0.1        | 10                 | 125                |
| <b>Fold 8</b>             | 0.9         | 0.0143845         | 18                   | Fold 8                       | 0.7         | 0.0483293         | 27                   | Fold 8                    | 50        | 2                 | 0.1        | 10                 | 76                 |
| <b>Fold 9</b>             | 0.9         | 0.0078476         | 28                   | Fold 9                       | 0.9         | 0.0078476         | 23                   | Fold 9                    | 150       | 1                 | 0.1        | 10                 | 83                 |
| <b>Fold 10</b>            | 0.8         | 0.02636651        | 21                   | Fold 10                      | 0.7         | 0.0078476         | 26                   | Fold 10                   | 100       | 1                 | 0.1        | 10                 | 63                 |
| <b>Average</b>            | <b>0.83</b> | <b>0.01244257</b> | <b>26.4</b>          | <b>Average</b>               | <b>0.77</b> | <b>0.01541508</b> | <b>25.6</b>          | <b>Average</b>            | <b>95</b> | <b>1.9</b>        | <b>0.1</b> | <b>10</b>          | <b>103.6</b>       |

**Supplementary Table S3 | Baseline characteristics of all of patients which consented to a second biopsy at 16 weeks**

| <b>Patients which consented to a second biopsy at 16 weeks</b>                       |                      |                      |                      |                    |
|--------------------------------------------------------------------------------------|----------------------|----------------------|----------------------|--------------------|
|                                                                                      | Overall (n=59)       | Rituximab (n=37)     | Tocilizumab (n=22)   | Unadjusted p value |
| <b>Gender = Male</b>                                                                 | 9 (15)               | 6 (16)               | 3 (14)               | 1                  |
| <b>Age, years</b>                                                                    | 54.2 (14.3)          | 54.6 (13.9)          | 53.6 (15.2)          | 0.79               |
| <b>Disease Duration, years</b>                                                       | 9.0 [4.0, 16.0]      | 10.0 [4.0, 17.0]     | 6.0 [3.2, 14.2]      | 0.17               |
| <b>Clinical disease activity index (CDAI)</b>                                        | 28.9 [22.2, 38.4]    | 30.4 [24.5, 38.5]    | 27.4 [21.7, 36.4]    | 0.4                |
| <b>Erythrocyte sedimentation rate (ESR), mm/h</b>                                    | 35.0 [19.5, 50.0]    | 38.0 [20.0, 52.0]    | 32.0 [20.0, 44.0]    | 0.46               |
| <b>C-reactive protein (CRP), mg/L</b>                                                | 10.0 [5.0, 23.0]     | 10.0 [5.0, 23.0]     | 11.5 [7.2, 28.8]     | 0.38               |
| <b>Rheumatoid factor (RF) OR Anti-citrullinated protein antibody (ACPA) positive</b> | 51 (86)              | 35 (95)              | 16 (73)              | 0.048              |
| <b>Rheumatoid factor (RF) positive</b>                                               | 43 (73)              | 30 (81)              | 13 (59)              | 0.12               |
| <b>Anti-citrullinated protein antibody (ACPA) positive</b>                           | 49 (83)              | 33 (89)              | 16 (73)              | 0.2                |
| <b>Creatinine (µmol/L)</b>                                                           | 57.0 [50.0, 66.0]    | 56.5 [51.5, 67.5]    | 57.0 [46.0, 63.0]    | 0.65               |
| <b>Alanine aminotransferase (ALT), U/L</b>                                           | 16.0 [11.0, 20.0]    | 14.0 [11.0, 18.5]    | 16.5 [13.5, 23.2]    | 0.12               |
| <b>Aspartate aminotransferase (AST), U/L</b>                                         | 19.0 [16.0, 23.0]    | 19.0 [15.5, 23.0]    | 17.0 [16.0, 23.0]    | 0.84               |
| <b>Haemoglobin, g/L</b>                                                              | 119.0 (14.5)         | 117.0 (13.7)         | 122.4 (15.6)         | 0.18               |
| <b>White Blood Cell count, 10<sup>9</sup>/L</b>                                      | 8.7 (2.7)            | 8.1 (2.7)            | 9.5 (2.6)            | 0.061              |
| <b>Platelets, 10<sup>9</sup>/L</b>                                                   | 310.0 [263.0, 388.0] | 311.0 [279.2, 359.5] | 283.0 [255.0, 388.0] | 0.54               |
| <b>Neutrophils, 10<sup>9</sup>/L</b>                                                 | 6.2 (2.4)            | 5.9 (2.3)            | 6.7 (2.4)            | 0.26               |
| <b>Lymphocytes, 10<sup>9</sup>/L</b>                                                 | 1.6 [1.2, 2.2]       | 1.4 [1.1, 2.1]       | 1.7 [1.5, 2.3]       | 0.023              |
| <b>Synovial semi-quantitative scores</b>                                             |                      |                      |                      |                    |
| CD20                                                                                 | 2.0 [1.0, 3.0]       | 2.0 [1.0, 3.0]       | 2.0 [1.0, 3.0]       | 0.72               |
| CD138                                                                                | 2.0 [0.0, 3.0]       | 2.0 [0.0, 3.0]       | 1.5 [1.0, 3.0]       | 0.92               |
| CD68 lining                                                                          | 1.0 [1.0, 2.0]       | 1.0 [1.0, 2.0]       | 1.0 [1.0, 2.0]       | 0.42               |
| CD68 sub-lining                                                                      | 2.0 [1.0, 3.0]       | 2.0 [1.0, 3.0]       | 2.0 [1.2, 3.0]       | 0.5                |
| CD3                                                                                  | 2.0 [1.0, 2.5]       | 2.0 [1.0, 2.0]       | 2.0 [1.0, 2.8]       | 0.78               |
| CD21 (Positive)                                                                      | 5 (9)                | 4 (11)               | 1 (5)                | 0.76               |
| <b>B cell status</b>                                                                 |                      |                      |                      | 0.66               |
| B cell poor                                                                          | 24 (41)              | 14 (38)              | 10 (45)              |                    |
| B cell rich                                                                          | 30 (51)              | 19 (51)              | 11 (50)              |                    |
| Germinal Centre                                                                      | 5 (8)                | 4 (11)               | 1 (5)                |                    |
| Unknown                                                                              | 0 (0%)               | 0 (0%)               | 0 (0%)               |                    |



|                                                                       |                    |                   |                    |      |
|-----------------------------------------------------------------------|--------------------|-------------------|--------------------|------|
| <b>Synovial Pathotype</b>                                             |                    |                   |                    | 0.58 |
| Fibroid                                                               | 5 (8)              | 4 (11)            | 1 (5)              |      |
| Lymphoid                                                              | 41 (69)            | 26 (70)           | 15 (68)            |      |
| Myeloid                                                               | 13 (22)            | 7 (19)            | 6 (27)             |      |
| Ungraded                                                              | 0 (0%)             | 0 (0%)            | 0 (0%)             |      |
| <b>Number of tender joints, 0-28</b>                                  | 11.0 [7.0, 17.0]   | 11.0 [7.0, 19.0]  | 10.0 [7.0, 13.8]   | 0.32 |
| <b>Number of swollen joints, 0-28</b>                                 | 6.0 [4.0, 8.5]     | 6.0 [4.0, 8.0]    | 4.0 [3.2, 10.0]    | 0.62 |
| <b>28 joint count Disease Activity Score (DAS-28), ESR</b>            | 5.9 (1.1)          | 5.9 (1.1)         | 5.8 (1.1)          | 0.64 |
| <b>28 joint count Disease Activity Score (DAS-28), CRP</b>            | 5.3 (1.0)          | 5.3 (1.0)         | 5.3 (1.1)          | 0.85 |
| <b>Patient's global assessment, 0-100 VAS</b>                         | 70.0 [51.0, 79.0]  | 64.0 [50.0, 78.0] | 72.0 [52.8, 85.5]  | 0.22 |
| <b>Physician's global assessment, 0-100 VAS</b>                       | 59.6 (20.8)        | 60.0 (19.7)       | 59.0 (23.0)        | 0.85 |
| <b>Patient's assessment of early morning stiffness, 0-100 VAS</b>     | 52.5 [20.0, 100.0] | 34.0 [20.0, 70.0] | 60.0 [22.5, 100.0] | 0.34 |
| <b>Patient's assessment of tiredness, 0-100 VAS</b>                   | 67.0 [52.0, 81.0]  | 67.0 [52.0, 73.0] | 71.0 [52.0, 93.5]  | 0.24 |
| <b>Patient's assessment of pain, 0-100 VAS</b>                        | 66.0 [48.5, 84.0]  | 65.0 [52.0, 78.0] | 73.0 [41.8, 89.5]  | 0.39 |
| <b>HAQ total score</b>                                                | 1.7 (0.6)          | 1.7 (0.7)         | 1.7 (0.5)          | 0.92 |
| <b>Functional Assessment of Chronic Illness Therapy (FACIT) score</b> | 21.4 (10.7)        | 21.1 (11.1)       | 21.9 (10.1)        | 0.78 |
| <b>Previous Methotrexate use</b>                                      | 59 (100)           | 37 (100)          | 22 (100)           |      |
| <b>Previous Prednisolone use</b>                                      | 29 (49)            | 18 (49)           | 11 (50)            | 1    |
| <b>Number of previous biologics used, [anti-TNF/Other**]</b>          |                    |                   |                    | 0.33 |
| 1                                                                     | 47 (80) [47/0]     | 31 (84) [31/0]    | 16 (73) [16/0]     |      |
| 2                                                                     | 11 (19) [10/1]     | 5 (14) [4/1]      | 6 (27) [6/0]       |      |
| 3+                                                                    | 1 (2) [1/0]        | 1 (3) [1/0]       | 0 (0) [0/0]        |      |

Data are n (%), median [IQR], mean (SD%). ECOG=Eastern Cooperative Oncology Group. BMI=body-mass index. CDAI=Clinical disease activity index. DAS28 =28 joint count disease activity score. CRP=C-reactive protein. ESR=erythrocyte sedimentation rate.

\*\*6 patients in total used non-TNFi biologics (5 Abatacept and 1 "vaccine RA TNF-K-006" for a clinical study%).

**Supplementary Table S4 | Demographics and disease activity of patients undergoing paired week 16 biopsy**

| Baseline characteristics                          | Total cohort<br>(N=161) | Consent to a second biopsy |                   | Unadjusted<br>p-value |
|---------------------------------------------------|-------------------------|----------------------------|-------------------|-----------------------|
|                                                   |                         | No<br>(N=96)               | Yes<br>(N=65)     |                       |
| Gender = M                                        | 33 (20.5)               | 23 (24.0)                  | 10 (15.4)         | 0.261                 |
| Age (years)                                       | 55.7 (12.9)             | 56.4 (12.4)                | 54.6 (13.7)       | 0.381                 |
| Disease Duration (years)                          | 9.0 [4.0, 19.0]         | 9.0 [5.0, 21.0]            | 10.0 [4.0, 16.0]  | 0.357                 |
| CDAI                                              | 29.8 [21.7, 40.6]       | 29.4 [21.2, 41.8]          | 30.4 [24.5, 39.7] | 0.707                 |
| ESR (mm/h)                                        | 31.5 [17.0, 48.0]       | 28.0 [17.0, 48.0]          | 35.0 [19.0, 50.0] | 0.202                 |
| CRP (mg/L)                                        | 11.0 [5.0, 27.5]        | 14.4 [5.0, 32.2]           | 10.0 [5.0, 25.0]  | 0.462                 |
| RF positive                                       | 105 (67.3)              | 60 (65.2)                  | 45 (70.3)         | 0.621                 |
| ACPA positive                                     | 119 (76.8)              | 70 (76.9)                  | 49 (76.6)         | 1.000                 |
| Tender Joint Count (28)                           | 11.0 [6.0, 18.0]        | 10.5 [5.8, 17.0]           | 11.0 [7.0, 18.0]  | 0.248                 |
| Swollen Joint Count (28)                          | 6.0 [3.0, 10.0]         | 6.0 [3.0, 11.2]            | 6.0 [4.0, 9.0]    | 0.919                 |
| DAS28 (ESR)                                       | 5.8 (1.2)               | 5.7 (1.4)                  | 5.9 (1.0)         | 0.311                 |
| DAS28 (CRP)                                       | 5.3 (1.2)               | 5.3 (1.3)                  | 5.3 (1.0)         | 0.829                 |
| <b>Week 16 Treatment response,<br/>N (%)</b>      |                         |                            |                   |                       |
| <b>CDAI ≥50% Response</b>                         | 81 (50.3)               | 56 (58.3)                  | 25 (38.5)         | 0.016*                |
| <b>CDAI-MTR</b>                                   | 52 (32.3)               | 40 (41.7)                  | 12 (18.5)         | 0.002*                |
| <b>Baseline histological score,<br/>mean (SD)</b> |                         |                            |                   |                       |
| <b>CD20+ B cells</b>                              | 1.56 (1.3)              | 1.38 (1.3)                 | 1.8 (1.3)         | 0.052                 |
| <b>CD138+ plasma cells</b>                        | 1.43 (1.4)              | 1.26 (1.4)                 | 1.65 (1.4)        | 0.077                 |
| <b>CD68L+ macrophages</b>                         | 1.15 (1)                | 1.05 (1)                   | 1.29 (1.1)        | 0.141                 |
| <b>CD68SL+ macrophages</b>                        | 1.71 (1)                | 1.57 (1.1)                 | 1.89 (0.9)        | 0.04*                 |
| <b>CD3+ T cells</b>                               | 1.45 (1.2)              | 1.32 (1.2)                 | 1.62 (1.1)        | 0.081                 |
| <b>Synovitis score</b>                            | 3.93 (2.8)              | 3.48 (2.8)                 | 4.54 (2.6)        | 0.019*                |

Data are n (%), median [IQR], mean (SD). ECOG=Eastern Cooperative Oncology Group. BMI=body-mass index. CDAI=Clinical disease activity index. DAS28 =28 joint count disease activity score. CRP=C-reactive protein. ESR=erythrocyte sedimentation rate. All comparisons were two-sided; Student's T-test or Mann-Whitney-U test was used for continuous variables

(based on normality of distribution) and Chi-Squared test or Fisher's exact test was used for categorical variables (based on low cell count occurrence, if at least one cell count in the 2xn contingency table was equal or less than 5, Fisher's test was used). No adjustment for multiple comparison was performed.

**Supplementary Table S5 | Baseline characteristics of patients with available RNAseq**

|                                                                               | Overall<br>(n=133)   | Rituximab (n=68)     | Tocilizumab<br>(n=65) | Unadjusted<br>p value |
|-------------------------------------------------------------------------------|----------------------|----------------------|-----------------------|-----------------------|
| Gender (Male)                                                                 | 24 (18%)             | 16 (24%)             | 8 (12%)               | 0.14                  |
| Age, years                                                                    | 55.1 (13.3)          | 54.7 (13.7)          | 55.6 (13.0)           | 0.69                  |
| Disease Duration, years                                                       | 9.0 [5.0, 19.0]      | 8.0 [4.0, 21.0]      | 10.0 [5.0, 18.0]      | 0.85                  |
| Clinical disease activity index (CDAI)                                        | 30.9 [21.7, 40.7]    | 31.0 [22.3, 41.1]    | 30.4 [21.7, 40.6]     | 0.83                  |
| Erythrocyte sedimentation rate (ESR), mm/h                                    | 32.0 [18.0, 46.0]    | 34.0 [17.8, 46.2]    | 28.0 [19.0, 45.0]     | 0.62                  |
| C-reactive protein (CRP), mg/L                                                | 11.0 [5.0, 23.0]     | 10.0 [5.0, 20.8]     | 15.0 [6.0, 29.0]      | 0.19                  |
| Rheumatoid factor (RF) OR Anti-citrullinated protein antibody (ACPA) positive | 115 (86%)            | 59 (87%)             | 56 (86%)              | 1                     |
| Rheumatoid factor (RF) positive                                               | 96 (72%)             | 52 (76%)             | 44 (68%)              | 0.35                  |
| Anti-citrullinated protein antibody (ACPA) positive                           | 104 (78%)            | 54 (79%)             | 50 (77%)              | 0.89                  |
| Creatinine (μmol/L)                                                           | 61.0 [54.0, 71.0]    | 63.0 [54.0, 72.5]    | 58.7 [54.0, 67.2]     | 0.36                  |
| Alanine aminotransferase (ALT), U/L                                           | 16.0 [11.0, 22.0]    | 16.0 [11.0, 20.0]    | 16.0 [12.0, 23.0]     | 0.41                  |
| Aspartate aminotransferase (AST), U/L                                         | 19.0 [15.0, 22.2]    | 19.0 [15.0, 22.0]    | 19.0 [16.0, 22.5]     | 0.73                  |
| Haemoglobin, g/L                                                              | 121.0 [110.0, 130.5] | 120.0 [108.5, 131.5] | 121.5 [111.0, 130.0]  | 0.81                  |
| White Blood Cell count, 10 <sup>9</sup> /L                                    | 8.0 [6.7, 10.2]      | 7.9 [6.2, 9.7]       | 8.5 [7.0, 10.3]       | 0.17                  |
| Platelets, 10 <sup>9</sup> /L                                                 | 304.0 [254.5, 394.0] | 303.0 [253.0, 364.5] | 304.0 [255.8, 413.8]  | 0.33                  |
| Neutrophils, 10 <sup>9</sup> /L                                               | 5.5 [4.4, 7.2]       | 5.7 [4.2, 7.1]       | 5.4 [4.6, 7.2]        | 0.28                  |
| Lymphocytes, 10 <sup>9</sup> /L                                               | 1.7 [1.3, 2.3]       | 1.6 [1.2, 2.2]       | 1.7 [1.4, 2.4]        | 0.15                  |
| Synovial semi-quantitative scores                                             |                      |                      |                       |                       |
| CD20                                                                          | 1.0 [0.0, 3.0]       | 1.5 [0.0, 3.0]       | 1.0 [0.0, 3.0]        | 0.85                  |
| CD138                                                                         | 1.0 [0.0, 3.0]       | 1.0 [0.0, 3.0]       | 1.0 [0.0, 3.0]        | 0.84                  |
| CD68 lining                                                                   | 1.0 [0.0, 2.0]       | 1.0 [0.8, 2.0]       | 1.0 [0.0, 2.0]        | 0.52                  |
| CD68 sub-lining                                                               | 2.0 [1.0, 2.0]       | 2.0 [1.0, 2.0]       | 2.0 [1.0, 3.0]        | 0.38                  |
| CD3                                                                           | 1.0 [0.0, 2.0]       | 1.0 [1.0, 2.0]       | 2.0 [0.0, 3.0]        | 0.61                  |
| CD21 (Positive)                                                               | 9 (8%)               | 5 (9%)               | 4 (7%)                | 1                     |
| Synovial Pathotype                                                            |                      |                      |                       | 0.22                  |

|                                                                |                    |                   |                    |      |
|----------------------------------------------------------------|--------------------|-------------------|--------------------|------|
| Fibroid                                                        | 24 (18%)           | 11 (16%)          | 13 (20%)           |      |
| Lymphoid                                                       | 74 (56%)           | 36 (53%)          | 38 (58%)           |      |
| Myeloid                                                        | 31 (23%)           | 17 (25%)          | 14 (22%)           |      |
| Ungraded                                                       | 4 (3%)             | 4 (6%)            | 0 (0%)             |      |
| B cell status                                                  |                    |                   |                    | 0.25 |
| B cell poor                                                    | 65 (49%)           | 32 (47%)          | 33 (51%)           |      |
| B cell rich                                                    | 55 (41%)           | 27 (40%)          | 28 (43%)           |      |
| Germinal Centre                                                | 9 (7%)             | 5 (7%)            | 4 (6%)             |      |
| Unknown                                                        | 4 (3%)             | 4 (6%)            | 0 (0%)             |      |
| Number of tender joints, 0-28                                  | 12.0 [6.0, 18.0]   | 11.0 [7.0, 18.2]  | 12.0 [6.0, 16.0]   | 0.67 |
| Number of swollen joints, 0-28                                 | 6.0 [4.0, 10.0]    | 6.0 [4.0, 9.0]    | 6.0 [3.0, 11.0]    | 0.73 |
| 28 joint count Disease Activity Score (DAS-28), ESR            | 5.8 (1.2)          | 5.9 (1.2)         | 5.8 (1.3)          | 0.95 |
| 28 joint count Disease Activity Score (DAS-28), CRP            | 5.4 (1.2)          | 5.3 (1.1)         | 5.4 (1.2)          | 0.62 |
| Patient's global assessment, 0–100 VAS                         | 72.0 [51.0, 85.0]  | 69.5 [48.5, 80.5] | 74.0 [53.0, 86.0]  | 0.18 |
| Physician's global assessment, 0–100 VAS                       | 60.3 (21.7)        | 60.4 (21.3)       | 60.2 (22.2)        | 0.96 |
| Patient's assessment of early morning stiffness, 0–100 VAS     | 32.5 [20.0, 100.0] | 30.0 [17.5, 80.0] | 45.0 [20.0, 100.0] | 0.26 |
| Patient's assessment of tiredness, 0–100 VAS                   | 68.0 [50.0, 83.0]  | 67.0 [45.5, 78.2] | 70.0 [50.0, 91.0]  | 0.17 |
| Patient's assessment of pain, 0–100 VAS                        | 71.0 [50.0, 87.0]  | 67.5 [49.8, 82.5] | 73.0 [50.0, 89.0]  | 0.34 |
| HAQ total score                                                | 1.7 (0.6)          | 1.7 (0.7)         | 1.7 (0.6)          | 0.72 |
| Functional Assessment of Chronic Illness Therapy (FACIT) score | 22.0 [15.0, 33.2]  | 23.0 [15.0, 32.0] | 21.5 [13.0, 34.0]  | 0.76 |
| Previous Methotrexate use                                      | 133 (100%)         | 68 (100%)         | 65 (100%)          |      |
| Previous Prednisolone use                                      | 74 (56%)           | 35 (51%)          | 39 (60%)           | 0.41 |
| Number of previous biologics used, [anti-TNF/Other**]          |                    |                   |                    | 0.19 |
| 1                                                              | 93 (70%) [93/0]    | 51 (75%) [51/0]   | 42 (65%) [42/0]    |      |
| 2                                                              | 32 (24%) [29/3]    | 12 (18%) [9/3]    | 20 (31%) [20/0]    |      |
| 3+                                                             | 8 (6%) [5/3]       | 5 (7%) [3/2]      | 3 (5%) [2/1]       |      |

Data are n (%), median [IQR], mean (SD%). ECOG=Eastern Cooperative Oncology Group. BMI=body-mass index. CDAl=Clinical disease activity index. DAS28 =28 joint count disease activity score. CRP=C-reactive protein. ESR=erythrocyte sedimentation rate.\*\*6 patients in total used non-TNFi biologics (5 Abatacept and 1 "vaccine RA TNF-K-006" for a clinical study%). All comparisons were two-sided; Student's T-test or Mann-Whitney-U test was used for continuous variables (based on normality of distribution) and Chi-Squared test or Fisher's exact test was used for categorical variables (based on low cell count occurrence, if at least one cell count in the 2x2 contingency table was equal or less than 5, Fisher's test was used). No adjustment for multiple comparison was performed.

**Supplementary Table S6 | Baseline characteristics of patients with RNA-Seq samples, stratified by treatment and CD4I50 response**

|                                        | Overall (n=133)      |                   |                       |                    | Rituximab (n=68)    |                   |                       |                    | Tocilizumab (n=65)  |                   |                       |                    |
|----------------------------------------|----------------------|-------------------|-----------------------|--------------------|---------------------|-------------------|-----------------------|--------------------|---------------------|-------------------|-----------------------|--------------------|
|                                        | All patients (n=133) | Responders (n=67) | Non-responders (n=66) | Unadjusted p-value | All patients (n=68) | Responders (n=39) | Non-responders (n=29) | Unadjusted p-value | All patients (n=65) | Responders (n=28) | Non-responders (n=37) | Unadjusted p-value |
| Histology B cell status                |                      |                   |                       | 0.665              |                     |                   |                       | 0.611              |                     |                   |                       | 0.53               |
| B cell poor                            | 65 (49%)             | 32 (48%)          | 33 (50%)              |                    | 32 (47%)            | 19 (49%)          | 13 (45%)              |                    | 33 (51%)            | 13 (46%)          | 20 (54%)              |                    |
| B cell rich                            | 55 (41%)             | 30 (45%)          | 25 (38%)              |                    | 27 (40%)            | 16 (41%)          | 11 (38%)              |                    | 28 (43%)            | 14 (50%)          | 14 (38%)              |                    |
| Germinal Centre                        | 9 (7%)               | 4 (6%)            | 5 (8%)                |                    | 5 (7%)              | 3 (8%)            | 2 (7%)                |                    | 4 (6%)              | 1 (4%)            | 3 (8%)                |                    |
| Unknown                                | 4 (3%)               | 1 (1%)            | 3 (5%)                |                    | 4 (6%)              | 1 (3%)            | 3 (10%)               |                    | 0 (0%)              | 0 (0%)            | 0 (0%)                |                    |
| Molecular B cell status = B cell rich  | 59 (48%)             | 30 (48%)          | 29 (48%)              | 1                  | 30 (48%)            | 15 (42%)          | 15 (56%)              | 0.402              | 29 (48%)            | 15 (56%)          | 14 (41%)              | 0.39               |
| Synovial Pathotype                     |                      |                   |                       | 0.484              |                     |                   |                       | 0.544              |                     |                   |                       | 0.048              |
| Fibroid                                | 24 (18%)             | 13 (19%)          | 11 (17%)              |                    | 11 (16%)            | 6 (15%)           | 5 (17%)               |                    | 13 (20%)            | 7 (25%)           | 6 (16%)               |                    |
| Lymphoid                               | 74 (56%)             | 40 (60%)          | 34 (52%)              |                    | 36 (53%)            | 21 (54%)          | 15 (52%)              |                    | 38 (58%)            | 19 (68%)          | 19 (51%)              |                    |
| Myeloid                                | 31 (23%)             | 13 (19%)          | 18 (27%)              |                    | 17 (25%)            | 11 (28%)          | 6 (21%)               |                    | 14 (22%)            | 2 (7%)            | 12 (32%)              |                    |
| Ungraded                               | 4 (3%)               | 1 (1%)            | 3 (5%)                |                    | 4 (6%)              | 1 (3%)            | 3 (10%)               |                    | 0 (0%)              | 0 (0%)            | 0 (0%)                |                    |
| Gender = Male                          | 24 (18%)             | 8 (12%)           | 16 (24%)              | 0.105              | 16 (24%)            | 4 (10%)           | 12 (41%)              | 0.007              | 8 (12%)             | 4 (14%)           | 4 (11%)               | 0.967              |
| Age, years                             | 55.1 (13.3)          | 53.8 (13.3)       | 56.4 (13.2)           | 0.26               | 54.7 (13.7)         | 54.3 (13.9)       | 55.1 (13.5)           | 0.811              | 55.6 (13.0)         | 53.1 (12.5)       | 57.5 (13.1)           | 0.185              |
| Disease Duration, years                | 9.0 [5.0, 19.0]      | 9.0 [4.5, 22.0]   | 9.0 [5.2, 17.8]       | 0.633              | 8.0 [4.0, 21.0]     | 10.0 [5.0, 22.5]  | 6.0 [4.0, 13.0]       | 0.146              | 10.0 [5.0, 18.0]    | 8.5 [4.0, 16.5]   | 10.0 [6.0, 19.0]      | 0.446              |
| Ethnicity                              |                      |                   |                       | 0.111              |                     |                   |                       | 0.884              |                     |                   |                       | 0.038              |
| African                                | 13 (10%)             | 7 (10%)           | 6 (9%)                |                    | 10 (15%)            | 6 (15%)           | 4 (14%)               |                    | 3 (5%)              | 1 (4%)            | 2 (5%)                |                    |
| Asian                                  | 9 (7%)               | 8 (12%)           | 1 (2%)                |                    | 4 (6%)              | 3 (8%)            | 1 (3%)                |                    | 5 (8%)              | 5 (18%)           | 0 (0%)                |                    |
| Caucasian                              | 104 (78%)            | 49 (73%)          | 55 (83%)              |                    | 49 (72%)            | 27 (69%)          | 22 (76%)              |                    | 55 (85%)            | 22 (79%)          | 33 (89%)              |                    |
| Other                                  | 7 (5%)               | 3 (4%)            | 4 (6%)                |                    | 5 (7%)              | 3 (8%)            | 2 (7%)                |                    | 2 (3%)              | 0 (0%)            | 2 (5%)                |                    |
| Clinical disease activity index (CDAI) | 30.9 [21.7, 40.7]    | 28.9 [21.0, 39.9] | 32.7 [23.2, 43.0]     | 0.431              | 31.0 [22.3, 41.1]   | 28.7 [20.0, 39.0] | 33.2 [28.1, 46.8]     | 0.073              | 30.4 [21.7, 40.6]   | 31.8 [22.0, 40.5] | 29.5 [21.3, 40.6]     | 0.582              |

|                                                                               |                      |                      |                      |       |                      |                      |                      |       |                      |                      |                      |       |
|-------------------------------------------------------------------------------|----------------------|----------------------|----------------------|-------|----------------------|----------------------|----------------------|-------|----------------------|----------------------|----------------------|-------|
| Erythrocyte sedimentation rate (ESR), mm/h                                    | 32·0 [18·0, 46·0]    | 35·0 [18·5, 47·5]    | 28·0 [18·2, 43·0]    | 0·399 | 34·0 [17·8, 46·2]    | 38·0 [23·5, 49·5]    | 29·0 [17·0, 43·0]    | 0·262 | 28·0 [19·0, 45·0]    | 33·0 [16·5, 45·8]    | 27·0 [19·0, 45·0]    | 0·895 |
| C-reactive protein (CRP), mg/L                                                | 11·0 [5·0, 23·0]     | 9·0 [4·0, 21·5]      | 11·5 [5·2, 27·8]     | 0·564 | 10·0 [5·0, 20·8]     | 8·0 [2·5, 16·0]      | 12·0 [5·0, 28·0]     | 0·138 | 15·0 [6·0, 29·0]     | 17·0 [8·0, 39·2]     | 11·0 [6·0, 27·0]     | 0·301 |
| Rheumatoid factor (RF) OR Anti-citrullinated protein antibody (ACPA) positive | 115 (86%)            | 58 (87%)             | 57 (86%)             | 1     | 59 (87%)             | 34 (87%)             | 25 (86%)             | 1     | 56 (86%)             | 24 (86%)             | 32 (86%)             | 1     |
| Rheumatoid factor (RF) positive                                               | 96 (72%)             | 50 (75%)             | 46 (70%)             | 0·659 | 52 (76%)             | 30 (77%)             | 22 (76%)             | 1     | 44 (68%)             | 20 (71%)             | 24 (65%)             | 0·77  |
| Anti-citrullinated protein antibody (ACPA) positive                           | 104 (78%)            | 50 (75%)             | 54 (82%)             | 0·427 | 54 (79%)             | 31 (79%)             | 23 (79%)             | 1     | 50 (77%)             | 19 (68%)             | 31 (84%)             | 0·226 |
| Haemoglobin, g/L                                                              | 121·0 [110·0, 130·5] | 118·0 [106·5, 130·5] | 126·0 [115·5, 129·5] | 0·134 | 120·0 [108·5, 131·5] | 114·0 [101·0, 128·5] | 128·0 [119·2, 135·2] | 0·006 | 121·5 [111·0, 130·0] | 122·0 [112·5, 138·8] | 121·5 [109·8, 128·2] | 0·452 |
| Number of tender joints, 0-28                                                 | 12·0 [6·0, 18·0]     | 12·0 [6·0, 16·5]     | 11·5 [7·0, 18·0]     | 0·69  | 11·0 [7·0, 18·2]     | 10·0 [6·0, 16·5]     | 13·0 [8·0, 21·0]     | 0·157 | 12·0 [6·0, 16·0]     | 12·0 [6·8, 16·2]     | 9·0 [6·0, 15·0]      | 0·457 |
| Number of swollen joints, 0-28                                                | 6·0 [4·0, 10·0]      | 6·0 [3·0, 10·0]      | 6·0 [4·0, 12·0]      | 0·302 | 6·0 [4·0, 9·0]       | 5·0 [3·0, 8·0]       | 8·0 [5·0, 13·0]      | 0·023 | 6·0 [3·0, 11·0]      | 6·5 [3·8, 10·2]      | 6·0 [3·0, 12·0]      | 0·527 |
| 28 joint count Disease Activity Score (DAS-28), ESR                           | 5·8 (1·2)            | 5·8 (1·2)            | 5·9 (1·2)            | 0·794 | 5·9 (1·2)            | 5·7 (1·2)            | 6·0 (1·2)            | 0·349 | 5·8 (1·3)            | 5·9 (1·3)            | 5·8 (1·3)            | 0·606 |
| 28 joint count Disease Activity Score (DAS-28), CRP                           | 5·4 (1·2)            | 5·3 (1·2)            | 5·4 (1·2)            | 0·516 | 5·3 (1·1)            | 5·1 (1·1)            | 5·6 (1·1)            | 0·055 | 5·4 (1·2)            | 5·6 (1·2)            | 5·3 (1·2)            | 0·318 |
| Ultrasound 12-max score (Power Doppler)                                       | 4·0 [0·5, 8·5]       | 2·0 [0·0, 7·5]       | 7·0 [4·0, 12·0]      | 0·012 | 4·0 [1·0, 8·0]       | 2·0 [0·5, 6·5]       | 6·0 [4·0, 9·8]       | 0·218 | 5·0 [0·2, 9·5]       | 1·5 [0·0, 8·0]       | 7·0 [4·5, 17·2]      | 0·02  |
| Ultrasound 12-max score (Synovial Thickening)                                 | 17·5 (8·4)           | 15·9 (7·5)           | 19·4 (9·1)           | 0·09  | 17·9 (7·2)           | 17·2 (5·6)           | 18·7 (8·8)           | 0·525 | 17·0 (9·8)           | 14·4 (9·2)           | 20·3 (9·8)           | 0·103 |
| van der Heijde modified Sharp score (SHSS), Total                             | 8·8 [2·4, 41·5]      | 9·5 [2·4, 40·5]      | 8·8 [2·4, 44·8]      | 1     | 8·5 [2·5, 40·5]      | 8·5 [2·0, 40·5]      | 8·5 [2·9, 33·0]      | 0·843 | 10·5 [2·0, 53·2]     | 10·5 [2·5, 32·0]     | 11·0 [0·9, 57·0]     | 0·894 |
| van der Heijde modified Sharp score (SHSS), Joint Space Narrowing             | 7·8 [1·0, 32·1]      | 8·0 [1·0, 30·2]      | 5·5 [1·8, 32·1]      | 0·98  | 5·0 [1·0, 30·0]      | 8·0 [1·0, 37·5]      | 3·0 [2·0, 16·1]      | 0·664 | 10·0 [1·0, 37·5]     | 9·5 [1·2, 28·2]      | 10·5 [0·8, 42·1]     | 0·653 |
| van der Heijde modified Sharp score (SHSS), Erosion                           | 1·8 [0·0, 11·0]      | 1·5 [0·0, 7·4]       | 3·5 [0·0, 11·8]      | 0·536 | 3·5 [0·0, 9·0]       | 1·5 [0·0, 8·5]       | 4·0 [0·5, 9·5]       | 0·512 | 0·5 [0·0, 12·5]      | 1·5 [0·0, 4·5]       | 0·5 [0·0, 17·9]      | 0·892 |
| Previous Methotrexate use                                                     | 133 (100%)           | 67 (100%)            | 66 (100%)            |       | 68 (100%)            | 39 (100%)            | 29 (100%)            |       | 65 (100%)            | 28 (100%)            | 37 (100%)            |       |
| Previous Prednisolone use                                                     | 74 (56%)             | 39 (58%)             | 35 (53%)             | 0·67  | 35 (51%)             | 21 (54%)             | 14 (48%)             | 0·834 | 39 (60%)             | 18 (64%)             | 21 (57%)             | 0·72  |

Data are n (%), median [IQR], mean (SD). ECOG=Eastern Cooperative Oncology Group. BMI=body-mass index. CDAl=Clinical disease activity index. DAS28 =28 joint count disease activity score. CRP=C-reactive protein. ESR=erythrocyte sedimentation rate. All comparisons were two-sided; Student's T-test or Mann-Whitney-U test was used for continuous variables (based on normality of

distribution) and Chi-Squared test or Fisher's exact test was used for categorical variables (based on low cell count occurrence, if at least one cell count in the 2xn contingency table was equal or less than 5, Fisher's test was used). No adjustment for multiple comparison was performed.



**Supplementary Table S7 | Antibodies used for immunofluorescence**

|                                                    | <b>Species</b> | <b>Conjugation</b> | <b>Cat #</b>            | <b>Conc. stock</b> | <b>Dilution</b> |
|----------------------------------------------------|----------------|--------------------|-------------------------|--------------------|-----------------|
| <b>Primary antibodies</b>                          |                |                    |                         |                    |                 |
| <b>DKK3</b>                                        | Rabbit         | N/A                | Sigma-Aldrich HPA011868 | 0.20 mg/ml         | 1:150           |
| <b>CD45</b>                                        | Mouse IgG1     | N/A                | Dako M0701              | -                  | 1:50            |
| <b>CD90</b>                                        | Rabbit         | N/A                | Abcam 133350            | 0.122 mg/ml        | 1:240           |
| <b>Secondary antibodies and detection systems</b>  |                |                    |                         |                    |                 |
| <b>Dako Envision+ System-HRP, Labelled Polymer</b> | Anti-mouse     | HRP                | DAKO 4001               | N/A                | N/A             |
| <b>Dako Envision+ System-HRP, Labelled Polymer</b> | Anti-rabbit    | HRP                | DAKO 4003               | N/A                | N/A             |
| <b>AlexaFluor488 Tyramide reagent</b>              | N/A            | AF488              | Invitrogen B40953       | N/A                | 1:100           |
| <b>AlexaFluor555 Tyramide reagent</b>              | N/A            | AF555              | Invitrogen B40955       | N/A                | 1:100           |
| <b>AlexaFluor647 Tyramide reagent</b>              | N/A            | AF647              | Invitrogen B40958       | N/A                | 1:100           |
| <b>DAPI, Dihydrochloride</b>                       | N/A            | N/A                | Cabiochem268298         | N/A                | 1:1000          |

| <b>Name</b>            | <b>Affiliation</b>                                                                                                                       |
|------------------------|------------------------------------------------------------------------------------------------------------------------------------------|
| Frances Humby          | Guy's and St Thomas' NHS Foundation Trust, London, UK                                                                                    |
| Myles Lewis            | Centre for Experimental Medicine and Rheumatology, Queen Mary University of London, London, UK                                           |
|                        | Department of Rheumatology, Mile End Hospital, Barts Health NHS Trust, London, UK                                                        |
| Felice Rivellesse      | Centre for Experimental Medicine and Rheumatology, Queen Mary University of London, London, UK                                           |
|                        | Department of Rheumatology, Mile End Hospital, Barts Health NHS Trust, London, UK                                                        |
| Alessandra Nerviani    | Centre for Experimental Medicine and Rheumatology, Queen Mary University of London, London, UK                                           |
|                        | Department of Rheumatology, Mile End Hospital, Barts Health NHS Trust, London, UK                                                        |
| Giovanni Giorli        | Centre for Experimental Medicine and Rheumatology, Queen Mary University of London, London, UK                                           |
| Michele Bombardieri    | Centre for Experimental Medicine and Rheumatology, Queen Mary University of London, London, UK                                           |
|                        | Department of Rheumatology, Mile End Hospital, Barts Health NHS Trust, London, UK                                                        |
| Georgina Thorborn      | Centre for Experimental Medicine and Rheumatology, Queen Mary University of London, London, UK                                           |
| Liliane Fossati-Jimack | Centre for Experimental Medicine and Rheumatology, Queen Mary University of London, London, UK                                           |
| Costantino Pitzalis    | Centre for Experimental Medicine and Rheumatology, Queen Mary University of London, London, UK                                           |
|                        | Department of Rheumatology, Mile End Hospital, Barts Health NHS Trust, London, UK                                                        |
| Patrick Durez          | Department of Rheumatology, Cliniques Universitaires Saint-Luc, Brussels, Belgium                                                        |
|                        | Institute of Experimental and Clinical Research (IREC), Université catholique de Louvain, Brussels, Belgium                              |
| Maya H Buch            | Centre for Musculoskeletal Research, Division of Musculoskeletal & Dermatological Sciences, The University of Manchester, Manchester, UK |
|                        | NIHR Manchester Biomedical Research Centre, Manchester, UK                                                                               |
| Hasan Rizvi            | Department of Cellular Pathology, Barts Health NHS Trust, London, UK                                                                     |
|                        | Institute of Health Sciences Education, Queen Mary, University of London, London, UK                                                     |
| Arti Mahto             | Department of Rheumatology, Kings College Hospital NHS Foundation Trust, London, UK                                                      |

|                          |                                                                                                                                                |
|--------------------------|------------------------------------------------------------------------------------------------------------------------------------------------|
| Carlomaurizio Montecucco | Department of Rheumatology, Fondazione I.R.C.C.S. Policlinico San Matteo, University of Pavia, Pavia Italy                                     |
| Bernard Lauwerys         | Department of Rheumatology, Cliniques Universitaires Saint-Luc, Brussels, Belgium                                                              |
|                          | Institute of Experimental and Clinical Research (IREC), Université catholique de Louvain, Brussels, Belgium                                    |
| Nora Ng                  | Rheumatology Department, Guy's and St Thomas' NHS Foundation Trust, London, UK                                                                 |
| Pauline Ho               | The Kellgren Centre for Rheumatology, Manchester Royal Infirmary, Manchester University NHS Foundation Trust, Manchester, UK                   |
| Vasco C Romão            | Rheumatology Department, Hospital De Santa Maria, Centro Hospitalar Universitário Lisboa Norte, Lisbon, Portugal                               |
|                          | Rheumatology Research Unit, Instituto de Medicina Molecular João Lobo Antunes, Faculdade de Medicina, Universidade de Lisboa, Lisbon, Portugal |
| Patrick Verschueren      | Skeletal Biology and Engineering (SBE) Research Centre, Department of Development and Regeneration, KU Leuven, Leuven, Belgium                 |
|                          | Division of Rheumatology, University Hospital Leuven, Leuven, Belgium                                                                          |
| Stephen Kelly            | Department of Rheumatology, Mile End Hospital, Barts Health NHS Trust, London, UK                                                              |
| Pier Paolo Sainaghi      | Department of Rheumatology, University of Eastern Piedmont (UPO) and Maggiore della Carita Hospital, Novara, Italy                             |
| Nagui Gendi              | Rheumatology Department, Basildon Hospital, Basildon, UK                                                                                       |
| Bhaskar Dasgupta         | Rheumatology Department, Mid & South Essex University Hospitals NHS Foundation Trust, Southend University Hospital, Westcliff-on-Sea, UK       |
| Alberto Cauli            | Rheumatology Unit, Department of Medicine and Public Health, AOU and University of Cagliari, Monserrato, Italy                                 |
| Piero Reynolds           | Department of Rheumatology, Homerton University Hospital, London, UK                                                                           |
| Juan D Cañete            | Rheumatology Department, Hospital Clínic de Barcelona, Barcelona, Spain                                                                        |
|                          | Institut d'Investigacions Biomèdiques August Pi I Sunyer (IDIBAPS), Barcelona, Spain                                                           |
| Robert Moots             | Academic Rheumatology Unit, Aintree University Hospital, Liverpool, UK                                                                         |
|                          | Faculty of Health, Social Care and Medicine, Edge Hill University, Ormskirk, UK                                                                |

|                               |                                                                                                                                                |
|-------------------------------|------------------------------------------------------------------------------------------------------------------------------------------------|
| Peter C Taylor                | Nuffield Department of Orthopaedics, Rheumatology and Musculoskeletal Sciences, Botnar Research Centre, University of Oxford, Oxford, UK       |
| Chris J Edwards               | NIHR Clinical Research Facility, University Hospital Southampton, Southampton, UK                                                              |
|                               | Faculty of Medicine, University of Southampton, Southampton, UK                                                                                |
| John Isaacs                   | Translational and Clinical Research Institute, Newcastle University, Newcastle upon Tyne, UK                                                   |
|                               | Musculoskeletal Unit, Newcastle upon Tyne hospitals NHS Foundation Trust, Newcastle upon Tyne, UK                                              |
| Peter Sasieni                 | King's Clinical Trials Unit, Kings College London, London, UK                                                                                  |
| Ernest Choy                   | CREATE Centre, Cardiff University, Cardiff, UK                                                                                                 |
|                               | Department of Rheumatology, University Hospital of Wales, Cardiff, UK                                                                          |
| Charlotte Thompson            | Brighton and Sussex Medical School, University of Sussex, Brighton, UK                                                                         |
| Serena Bugatti                | Department of Rheumatology, Fondazione I.R.C.C.S. Policlinico San Matteo, University of Pavia, Pavia Italy                                     |
| Mattia Bellan                 | Department of Rheumatology, University of Eastern Piedmont (UPO) and Maggiore della Carita Hospital, Novara, Italy                             |
| Mattia Congia                 | Rheumatology Unit, Department of Medicine and Public Health, AOU and University of Cagliari, Monserrato, Italy                                 |
| Christopher Holroyd           | Southampton General Hospital, University Hospital Southampton NHS Foundation Trust, Southampton, UK                                            |
| Arthur Pratt                  | Newcastle University, Newcastle upon Tyne, UK                                                                                                  |
|                               | Newcastle Hospitals NHS Trust, Newcastle upon Tyne, UK                                                                                         |
| João Eurico Cabral da Fonseca | Rheumatology Research Unit, Instituto de Medicina Molecular João Lobo Antunes, Faculdade de Medicina, Universidade de Lisboa, Lisbon, Portugal |
| Laura White                   | Cancer Research UK & UCL Cancer Trials Centre, University College London, London, UK                                                           |
| Louise Warren                 | Centre for Experimental Medicine and Rheumatology, Queen Mary University of London, London, UK                                                 |
| Joanna Peel                   | Centre for Experimental Medicine and Rheumatology, Queen Mary University of London, London, UK                                                 |
| Rebecca Hands                 | Centre for Experimental Medicine and Rheumatology, Queen Mary University of London, London, UK                                                 |
| Gaye Hadfield                 | Centre for Experimental Medicine and Rheumatology, Queen Mary University of London, London, UK                                                 |
| Julio Ramirez                 | Rheumatology Department, Hospital Clínic de Barcelona, Barcelona, Spain                                                                        |
| Raquel Celis                  | Rheumatology Department, Hospital Clínic de Barcelona, Barcelona, Spain                                                                        |
